# Supplementary material
Source: PubMed Central journal article supplement (PMC4068480)
Supplement: AAC.02672-13_zac006142874so1.pdf [file AAC.02672-13_zac006142874so1.pdf]

**Supplementary Table 1 Susceptibility to MCB of replicons containing NS5B coding region from clinical isolates**

| <b>Patient*</b> | <b>Study visit</b> | <b>GT</b> | <b>NS5B substitutions</b> | <b>Sample EC<sub>50</sub> MCB (μM) ± SD (n)</b> | <b>EC<sub>50</sub> fold /day 1</b> | <b>H77 ref EC<sub>50</sub> MCB (μM) ± SD (n)</b> | <b>EC<sub>50</sub> fold /H77</b>  |
|-----------------|--------------------|-----------|---------------------------|-------------------------------------------------|------------------------------------|--------------------------------------------------|-----------------------------------|
| <b>1*</b>       | Day 1              | 1A        |                           | 0.25 ± 0.10 (4)                                 |                                    | 0.33 ± 0.13 (6)                                  | 0.76                              |
|                 | PDISC              |           | S282T                     | 0.81 ± 0.09 (3)                                 | 3.2                                | 0.33 ± 0.13 (6)                                  | 2.4                               |
|                 | FUW8               |           | none                      | 0.26 ± 0.08 (8)                                 | 1.0                                | 0.33 ± 0.13 (6)                                  | 0.79                              |
| <b>Patient*</b> | <b>Study visit</b> | <b>GT</b> | <b>NS5B substitutions</b> | <b>Sample EC<sub>50</sub> MCB (μM, n=1)</b>     | <b>EC<sub>50</sub> fold /day 1</b> | <b>Con1 ref EC<sub>50</sub> MCB (μM, n=1)</b>    | <b>EC<sub>50</sub> fold /Con1</b> |
| <b>2</b>        | Day 1              | 1A        |                           | 0.29                                            |                                    | 0.38                                             | 0.75                              |
|                 | PDISC              |           | S282T                     | 0.93                                            | 3.2                                | 0.53                                             | 1.7                               |
|                 | FUW2               |           | S282T                     | 1.17                                            | 4.1                                | 0.53                                             | 2.2                               |
|                 | FUW4               |           | S282S/T                   | 0.30                                            | 1.0                                | 0.38                                             | 0.78                              |
|                 | FUW8               |           | none                      | 0.26                                            | 0.9                                | 0.53                                             | 0.49                              |
|                 | FUW12              |           | none                      | 0.30                                            | 1.0                                | 0.38                                             | 0.78                              |
| <b>3</b>        | Day 1              | 1A        |                           | 0.34                                            |                                    | 0.41                                             | 0.82                              |
|                 | W24                |           | L159F/L +L320F**          | 0.55                                            | 1.6                                | 0.41                                             | 1.3                               |

\*The NS5B coding region was cloned into H77 (GT 1a) replicon genetic background for patient 1, and Con1 (GT 1b) for patients 2 and 3. Patient 1 was tested in-house; patients 2 and 3 were tested at Monogram Sciences. The reference strain (ref) used for each assay is indicated.

\*\*Initial sequencing showed L159F/L and L320F, repeated sequencing of samples used for phenotyping showed L320F only.

PDISC: premature discontinuation. FUW: follow-up week. W: week.

**Supplementary Table 2 Susceptibility to DNV of replicons containing NS3 protease coding region from clinical isolates from patients who experienced viral breakthrough**

| Patient* | Study visit | GT | NS3 substitutions      | Sample EC <sub>50</sub> DNV (nM) ± SD (n)   | EC <sub>50</sub> fold /day 1 | Con1 ref EC <sub>50</sub> DNV (nM) ± SD (n) | EC <sub>50</sub> fold /Con1 |
|----------|-------------|----|------------------------|---------------------------------------------|------------------------------|---------------------------------------------|-----------------------------|
| 1        | Day 1       | 1A |                        | 0.27 ± 0.06 (3)                             |                              | 0.15 ± 0.04 (9)                             | 1.8                         |
|          | Week 6      |    | R155K                  | 132 ± 21 (3)                                | 492                          | 0.15 ± 0.04 (9)                             | 880                         |
|          | PDISC       |    | R155K                  | 118 ± 23 (3)                                | 442                          | 0.15 ± 0.04 (9)                             | 787                         |
|          | FUW12       |    | none                   | biphasic dose response curve (see Figure 2) |                              |                                             |                             |
| Patient* | Study visit | GT | NS3 substitutions      | Sample EC <sub>50</sub> DNV (nM, n=1)       | EC <sub>50</sub> fold /day 1 | Con1 ref EC <sub>50</sub> DNV (nM, n=1)     | EC <sub>50</sub> fold /Con1 |
| 2        | Day 1       | 1A |                        | 3.37                                        |                              | 0.53                                        | 6.3                         |
|          | PDISC       |    | R155K                  | 327                                         | 97                           | 0.53                                        | 610                         |
|          | FUW2        |    | R155K                  | 252                                         | 75                           | 0.53                                        | 470                         |
|          | FUW4        |    | R155K                  | 257                                         | 76                           | 0.53                                        | 480                         |
|          | FUW8        |    | R155K                  | 258                                         | 77                           | 0.53                                        | 482                         |
|          | FUW12       |    | R155R/K                | 163                                         | 48                           | 0.53                                        | 303                         |
| 3        | Day 1       | 1A |                        | 0.29                                        |                              | 0.49                                        | 0.58                        |
|          | W24         |    | V36M, R155K            | 243                                         | 844                          | 0.49                                        | 492                         |
| 4        | Day 1       | 1A |                        | 0.34                                        |                              | 0.49                                        | 0.69                        |
|          | W10         |    | V36M, R155K            | 202                                         | 594                          | 0.53                                        | 378                         |
|          | FUW12       |    | R155K                  | 72                                          | 213                          | 0.53                                        | 135                         |
| 5        | Day 1       | 1B |                        | 0.36                                        |                              | 0.49                                        | 0.72                        |
|          | W14         |    | D168T                  | 152                                         | 427                          | 0.49                                        | 308                         |
|          | FUW12       |    | R155R/K/Q, D168D/A/N/T | 56                                          | 158                          | 0.49                                        | 114                         |
| 6        | Day 1       | 1B |                        | 0.27                                        |                              | 0.49                                        | 0.54                        |
|          | W18         |    | V36G, D168E,           | 440                                         | 1645                         | 0.49                                        | 889                         |
|          | FUW4        |    | R155K                  | 106                                         | 397                          | 0.49                                        | 215                         |
|          | FUW12       |    | R155R/K/Q, D168D/E     | 26                                          | 98                           | 0.49                                        | 53                          |

\*The NS3 protease coding region was cloned into Con1 (GT 1b) replicon genetic background. Patient 1 was tested in-house; patients 2-6 were tested at Monogram Sciences. The reference strain (ref) used in the assay is indicated.

PDISC: premature discontinuation. FUW: follow-up week. W: week.

**Supplementary Table 3 Susceptibility to DNV of replicons containing NS3 protease coding region from clinical isolates from patients who relapsed**

| Patient* | Study visit | GT | NS3 substitutions | Sample EC <sub>50</sub> DNV (nM, n=1) | EC <sub>50</sub> fold /Day 1 | Con1 ref EC <sub>50</sub> DNV (nM, n=1) | EC <sub>50</sub> fold /Con1 |
|----------|-------------|----|-------------------|---------------------------------------|------------------------------|-----------------------------------------|-----------------------------|
| 7        | Day 1       | 1B |                   | 0.30                                  |                              | 0.49                                    | 0.61                        |
|          | FUW4        |    | D168E             | 43.6                                  | 145                          | 0.49                                    | 88                          |
| 8        | Day 1       | 1B |                   | 0.15                                  |                              | 0.49                                    | 0.30                        |
|          | FUW8        |    | R155R/Q, D168A    | 1.72                                  | 11.5                         | 0.49                                    | 3.48                        |
| 9        | Day 1       | 1B |                   | 0.25                                  |                              | 0.49                                    | 0.52                        |
|          | Unscheduled |    | R155K             | 36.3                                  | 143                          | 0.49                                    | 73                          |
| 10       | Day 1       | 1B |                   | 0.24                                  |                              | 0.49                                    | 0.50                        |
|          | FUW4        |    | D168A             | 40.9                                  | 167                          | 0.49                                    | 83                          |
| 11       | Day 1       | 1B |                   | Not done                              | NA                           | NA                                      | NA                          |
|          | FUW2        |    | V36A, D168E       | 254                                   | NA                           | 0.49                                    | 514                         |
| 12       | Day 1       | 1B | None              | 0.13                                  |                              | 0.49                                    | 0.27                        |
|          | FUW8        |    | None              | 1.57                                  | 11.6                         | 0.49                                    | 3.18                        |
|          | FUW12       |    | None              | 0.83                                  | 6.2                          | 0.48                                    | 1.75                        |
| 13       | Day 1       | 1A |                   | 1.48                                  |                              | 0.53                                    | 2.8                         |
|          | FUW2        |    | R155K             | 100                                   | 67.7                         | 0.53                                    | 188                         |
|          | FUW4        |    | R155R/K, D168D/E  | 85.0                                  | 57.3                         | 0.53                                    | 159                         |
| 14       | Day 1       | 1A |                   | 0.22                                  |                              | 0.53                                    | 0.42                        |
|          | FUW4        |    | R155K             | 166                                   | 748                          | 0.49                                    | 336                         |
| 15       | Day 1       | 1A |                   | 0.16                                  |                              | 0.53                                    | 0.30                        |
|          | FUW2        |    | R155K             | 67.4                                  | 424                          | 0.53                                    | 126                         |
| 16       | Day 1       | 1A |                   | 0.41                                  |                              | 0.53                                    | 0.77                        |
|          | FUW4        |    | R155K             | 77.1                                  | 188                          | 0.49                                    | 156                         |
| 17       | Day 1       | 1B | D168D/E           | 2.88                                  |                              | 0.54                                    | 5.3                         |
|          | FUW4        |    | D168E             | 17.76                                 | 6.2                          | 0.54                                    | 33                          |
| 18       | Day 1       | 1B |                   | 0.24                                  |                              | 0.44                                    | 0.53                        |
|          | FUW8        |    | D168T             | 34.5                                  | 146                          | 0.49                                    | 70                          |

\*The NS3 protease coding region was cloned into Con1 (GT 1b) replicon genetic background. All patients (7-18) were tested at Monogram Sciences. The reference strain (ref) used in the assay is indicated. FUW: follow-up week. NA: not applicable.
